# Supplementary material for: A highly stable, nondigestible lectin from Pomacea diffusa unveils clade-related protection systems in apple snail eggs
Source: Oxford University Press journal article supplement (doi:10.1242/jeb.231878), 2020-01-01
Supplement: jeb231878supp.pdf [file jeb231878supp.pdf]

**Table S1: Peptide sequences employed to identify PdPV1 subunits.**

| <b>PdPV1-1</b><br>(PV1-A1)<br>Pdi67619_c0_g1 | <b>PdPV1-2</b><br>(PV1-A2)<br>Pdi37843_c0_g1 | <b>PdPV1-3</b><br>(PV1-A3)<br>Pdi14773_c0_g1 | <b>PdPV1-4</b><br>(PV1-A4)<br>Pdi37785_c0_g1 | <b>PdPV1-5</b><br>(PV1-B1)<br>Pdi118877_c0_g1 | <b>PdPV1-6</b><br>(PV1-B3)<br>Pdi33234_c0_g1 |
|----------------------------------------------|----------------------------------------------|----------------------------------------------|----------------------------------------------|-----------------------------------------------|----------------------------------------------|
| -                                            | <b>XDEY(G)IMEINPPXXVXSQ</b>                  | <b>(S)QEYLLLDHIEASTQ</b>                     | -                                            | <b>EXXMHDLVV</b>                              |                                              |
| TFIDSPNK                                     | VSVTPAEDMVDTMQK                              | SKPTPLQDMADLMEEIGVGWPK                       | SPQEIRDEMKDTEVLYSFK                          | QYDSEFK                                       | MNLKDVNEITPVQLEER                            |
| SVEDYKDMLKEVDLVYSFK                          | VSVTPAEDMVDTMQK                              | QNLDDASNTGIDVLGGPGNAR                        | SPQEIRDEMKDTEVLYSFK                          | NKISFVQILR                                    | GQTLQQYEAEK                                  |
| SVEDYKDMLK                                   | VSVTPAEDMVDTMQK                              | IYFFINIPR                                    | YYIIEVKDSEK                                  | YLAVVREPFTR                                   |                                              |
| SVEDYKDMLK                                   | VSEQEILNMLSPLEIKHK                           | HLIVVKQNDLNLEK                               | MYIYINIPLEVDVDFASK                           | VYISSGFPPK                                    |                                              |
| SKSVEDYKDMLK                                 | EGVDIWWGGPGEYHVKPEYLIR                       | ANGAYPPK                                     | MVPVDMFDLAK                                  | TLTLIKYTPSLK                                  |                                              |
| TLKFEGEPTQGAISHVQAYGEKIK                     | ATGVTPHKHFFVSSAR                             | TSVQYLTK                                     | TKMVPVDMFDLAK                                | TLKQYDSEFKR                                   |                                              |
| TLKFEGEPTQGAISHVQAYGEK                       | KVSEQEILNMLSPLEIKHK                          | TMEQYMSEK                                    | TLPLEGLTTQQR                                 | TLKQYDSEFK                                    |                                              |
| FEGEPTQGAISHVQAYGEK                          | HFFVSSARDEVEVIGR                             | TMEQYMSEK                                    | MYIYINIPLEVDVDFASK                           | GLFVKELGTSK                                   |                                              |
| EVDLVYSFKVVGSSR                              | LDPVGYMK                                     |                                              | GFMEEEKDSFQK                                 | CLNTALKDYPK                                   |                                              |
| EVDLVYSFK                                    | HFFVSSAR                                     |                                              | GFMEEEKDSFQK                                 | GLFVKELGTSKYLAVVR                             |                                              |
| INLPGDVISIAVGLNDK                            |                                              |                                              | DEMKDTEVLYSFK                                | LEISVPPSK                                     |                                              |
| INLPGDVISIAVGLNDKMR                          |                                              |                                              | DEMKDTEVLYSFK                                | KLEISVPPSK                                    |                                              |
| INLPGDVISIAVGLNDKMR                          |                                              |                                              | ALGAPSYQIVVEVNSLNR                           | NKISFVQILRLN                                  |                                              |
| IKTFIDSPNKGfyPLGR                            |                                              |                                              | AFYTNSSPPK                                   |                                               |                                              |
| SKSVEDYKDMLK                                 |                                              |                                              | YYIIEVKDSEKSPQEIR                            |                                               |                                              |
| MNESSYEK                                     |                                              |                                              | KLEEVKLGK                                    |                                               |                                              |
| MNESSYEK                                     |                                              |                                              | KLEEVKLGK                                    |                                               |                                              |
|                                              |                                              |                                              | YYIIEVK                                      |                                               |                                              |

Subunit names in parenthesis correspond to the general nomenclature adopted for Ampullariid PV1s followed by the unigene IDs taken from Ip et al. (2018). N-terminal sequences (bold) and internal aminoacid sequences of PdPV1 subunits were obtained by Edman degradation and MS/MS, respectively.

Figure S1: Subunit sequences of PdPV1.

**A**

**PdPV1-1** (Pdi67619\_c0\_g1)  
MLVATLILVALSAVFTNVVYASCQYIILDVNVKSKSVEDYKDMLEVDLVYSFKVVGSSRLLFVVRMNESSYEKLSKINLPGDVISIAGVDLNDKMR  
 TMGVDWKKWDELNPANLTLFERTLKFEGEPTQGAISHVQAYGEKIKTFIDSPFNKGFYPLGRTPFKAYFIISLFRCHQVGVGSAYALNLYNGPGD  
 STIKVEFLTKV

**PdPV1-2** (Pdi37843\_c0\_g1)  
MFVATSLLLALATLVATVASKDEYLIMEINPPKKVSESEQEILNMLSLEIKHKFRVTGTTKLWIVIKLDPVGYMKLDNITVPKGVSVTPAEDMVDTM  
 QKFGVFWPQASLTEENITLQFSHSYLDVTKQEQLTAMMVGYGEHVMVETLKSHPYQFYRATGVTPHKHHFFVSSARDEVEVIGREGVDIWGPG  
 EYHKPEYLIRI

**PdPV1-3** (Pdi14773\_c0\_g1)  
MYALAIALLAFSTFVSNAIARQEYLLLDIIEASTQEINTALSDIEIELFKIKGTSRHLIVVKQNDLNLEKAKIDIPGKSKPTPLQDMADLMEEIGVGW  
 PKRELTVNVTFLFERTLNLEDRTMEQYMSSEKMAYGQLITPLSSYSYRAFKAANGAYPPKIYFFINIPRQNLDDASNTGIDVLGGPGNARTSVQYLT  
 KLS

**PdPV1-4** (Pdi37785\_c0\_g1)  
MAEHRIPVFLFLVVAASSLAQMLPHQKYIIEVVDKSEKSPQEIRDEMKTDEVLYSFKALGAPSYQIVVEVNSLNRKLEELVKGKTKMVPVVD  
 MFDLAKTLGVTWRYCAHLADTNTLTVERTLPLEGLTTQQRRAHLKGFMEIEKDSFKQKYSYRAFVYNGSSPPKMYIYINIPLEDDVDFASKGTLNFG  
 GPGALYTSASFISSFPK

**PdPV1-5** (Pdi118877\_c0\_g1)  
RQLATSSHIANLSSLEDCSRQSRMVATLALLLAMSIVLPSGAEWGMHDLVVVEWDTCASGEKLPILTNRTLIPKGLFVKELGTSKYLAVVREPFL  
 TRNFSDVVEVTPVEDVNDVMKKLEISVPPSKDISNKTLLIKYIPSLKGLTKLQYDSEFKRLGKCLNTALKDYPKRVYISSGFPPKYYFLEIPLIEF  
 SFSALDIFGGPGSTKNKISFVQILREN

**PdPV1-6** (Pdi33234\_c0\_g1)  
VLLAMSTLLTRVEMKEDSLVYLEVDGSEENLFTFQNRSIIPRGFSGKVGVTSTFFAVLREPDLARMNLKDVNEITPVIQLEERENLKVWVWPL  
 HRDINTELWLFKVPILKQTLQYEAELKHLIRTVASVKQTFCHRVIYSKGSFPPKFIYFVNKEKDLKAFINALNIFGGPGSTNVEASYVHILLR

**B**

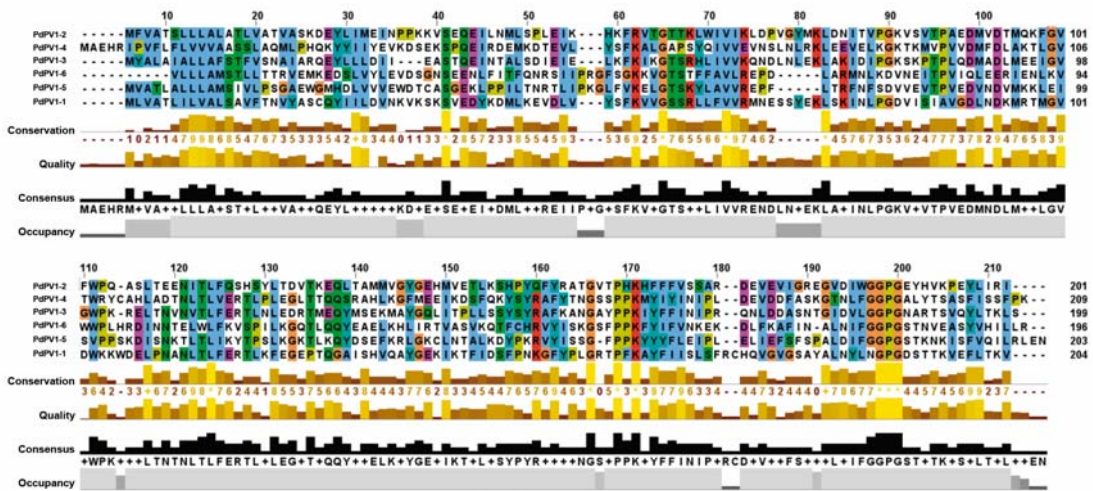

A) Deduced amino acid sequences of the six PdPV1 subunits. Putative signal sequences are in italics and underlined. Potential phosphorylation sites are in bold underlined, potential N- and O-glycosylation sites are in bold and on black squares respectively. A conserved sequence is marked in bold red. B) Multiple sequence alignment of PdPV1 subunits.
